# Supplementary material for: Cost-effectiveness of adding oseltamivir to primary care for influenza-like-illness: economic evaluation alongside the randomised controlled ALIC4E trial in 15 European countries
Source: PubMed Central journal article supplement (PMC10290610; doi:10.1007/s10198-022-01521-2), 2022-09-22
Supplement: 10198_2022_1521_MOESM1_ESM.pdf [file 10198_2022_1521_MOESM1_ESM.pdf]

**Table 1.** The CHEERS 2022 checklist.

| Section/topic                                                         | Item No | Guidance for reporting                                                                                                                                                        | Reported in section                                            |
|-----------------------------------------------------------------------|---------|-------------------------------------------------------------------------------------------------------------------------------------------------------------------------------|----------------------------------------------------------------|
| <b>Title</b>                                                          |         |                                                                                                                                                                               |                                                                |
| Title                                                                 | 1       | Identify the study as an economic evaluation and specify the interventions being compared.                                                                                    | Title page                                                     |
| <b>Abstract</b>                                                       |         |                                                                                                                                                                               |                                                                |
| Abstract                                                              | 2       | Provide a structured summary that highlights context, key methods, results, and alternative analyses.                                                                         | Abstract in page 1                                             |
| <b>Introduction</b>                                                   |         |                                                                                                                                                                               |                                                                |
| Background and objectives                                             | 3       | Give the context for the study, the study question, and its practical relevance for decision making in policy or practice.                                                    | Introduction section                                           |
| <b>Methods</b>                                                        |         |                                                                                                                                                                               |                                                                |
| Health economic analysis plan                                         | 4       | Indicate whether a health economic analysis plan was developed and where available.                                                                                           | Method section 2.3                                             |
| Study population                                                      | 5       | Describe characteristics of the study population (such as age range, demographics, socioeconomic, or clinical characteristics).                                               | Method section 2.1                                             |
| Setting and location                                                  | 6       | Provide relevant contextual information that may influence findings.                                                                                                          | Method section 2.1                                             |
| Comparators                                                           | 7       | Describe the interventions or strategies being compared and why chosen.                                                                                                       | Method section 2.1                                             |
| Perspective                                                           | 8       | State the perspective(s) adopted by the study and why chosen.                                                                                                                 | Method section 2.3                                             |
| Time horizon                                                          | 9       | State the time horizon for the study and why appropriate.                                                                                                                     | Method section 2.3                                             |
| Discount rate                                                         | 10      | Report the discount rate(s) and reason chosen.                                                                                                                                | Method section 2.3 (no discounting, time horizon 14 days)      |
| Selection of outcomes                                                 | 11      | Describe what outcomes were used as the measure(s) of benefit(s) and harm(s).                                                                                                 | Section 2.2                                                    |
| Measurement of outcomes                                               | 12      | Describe how outcomes used to capture benefit(s) and harm(s) were measured.                                                                                                   | Section 2.2 and Table 2                                        |
| Valuation of outcomes                                                 | 13      | Describe the population and methods used to measure and value outcomes.                                                                                                       | Section 2.2, Table 1 and 2                                     |
| Measurement and valuation of resources and costs                      | 14      | Describe how costs were valued.                                                                                                                                               | Section 2.3                                                    |
| Currency, price date, and conversion                                  | 15      | Report the dates of the estimated resource quantities and unit costs, plus the currency and year of conversion.                                                               | Used individual patient data, so model is not used             |
| Rationale and description of model                                    | 16      | If modelling is used, describe in detail and why used. Report if the model is publicly available and where it can be accessed.                                                | Section 2.2 and Supplementary material method section          |
| Analytics and assumptions                                             | 17      | Describe any methods for analysing or statistically transforming data, any extrapolation methods, and approaches for validating any model used.                               | Section 2.3                                                    |
| Characterizing heterogeneity                                          | 18      | Describe any methods used for estimating how the results of the study vary for subgroups.                                                                                     | Section 2.3, used individual patient data and bootstrap method |
| Characterizing distributional effects                                 | 19      | Describe how impacts are distributed across different individuals or adjustments made to reflect priority populations.                                                        | Not applicable                                                 |
| Characterizing uncertainty                                            | 20      | Describe methods to characterise any sources of uncertainty in the analysis.                                                                                                  | Table 1 and Table 2 and Supplementary material                 |
| Approach to engagement with patients and others affected by the study | 21      | Describe any approaches to engage patients or service recipients, the general public, communities, or stakeholders (such as clinicians or payers) in the design of the study. | Section 3.1                                                    |
| <b>Results</b>                                                        |         |                                                                                                                                                                               |                                                                |
| Study parameters                                                      | 22      | Report all analytic inputs (such as values, ranges, references) including uncertainty or distributional assumptions.                                                          | Section 3.1                                                    |
| Summary of main results                                               | 23      | Report the mean values for the main categories of costs and outcomes of interest and summarise them in the most appropriate overall measure.                                  |                                                                |

*continued on next page*

**Table 1.** Continued

| Section/topic                                                        | Item No | Guidance for reporting                                                                                                                                                   | Reported in section         |
|----------------------------------------------------------------------|---------|--------------------------------------------------------------------------------------------------------------------------------------------------------------------------|-----------------------------|
| Effect of uncertainty                                                | 24      | Describe how uncertainty about analytic judgments, inputs, or projections affect findings. Report the effect of choice of discount rate and time horizon, if applicable. | Section 3.2-3.5, Figure 1-5 |
| Effect of engagement with patients and others affected by the study  | 25      | Report on any difference patient/service recipient, general public, community, or stakeholder involvement made to the approach or findings of the study                  | Not applicable              |
| <b>Discussion</b>                                                    |         |                                                                                                                                                                          |                             |
| Study findings, limitations, generalizability, and current knowledge | 26      | Report key findings, limitations, ethical or equity considerations not captured, and how these could affect patients, policy, or practice.                               | Section 4.2                 |
| <b>Other relevant information</b>                                    |         |                                                                                                                                                                          |                             |
| Source of funding                                                    | 27      | Describe how the study was funded and any role of the funder in the identification, design, conduct, and reporting of the analysis                                       | Title page (unbind)         |
| Conflicts of interest                                                | 28      | Report authors conflicts of interest according to journal or International Committee of Medical Journal Editors requirements.                                            | Title page (unbind)         |
